# Supplementary material for: Stabilized Molybdenum Trioxide Nanowires as Novel Ultrahigh‐Capacity Cathode for Rechargeable Zinc Ion Battery
Source: PubMed Central journal article supplement (PMC6662057; doi:10.1002/advs.201900151), 2019-05-14
Supplement: ADVS-6-1900151-s001.pdf [file ADVS-6-1900151-s001.pdf]

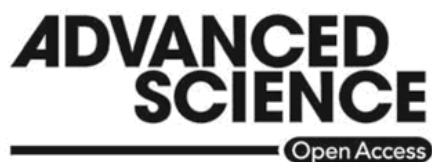

## Supporting Information

for *Adv. Sci.*, DOI: 10.1002/adv.201900151

Stabilized Molybdenum Trioxide Nanowires as Novel  
Ultrahigh-Capacity Cathode for Rechargeable Zinc Ion  
Battery

*Xinjun He, Haozhe Zhang, Xingyu Zhao, Peng Zhang,  
Minghua Chen,\* Zhikun Zheng, Zhiji Han, Tingshun Zhu,  
Yexiang Tong, and Xihong Lu\**

## Supporting Information

**Stabilized Molybdenum Trioxide Nanowires as Novel Ultrahigh-Capacity Cathode for Rechargeable Zinc ion Battery**

Xinjun He,<sup>a,b</sup> Haozhe Zhang,<sup>b</sup> Xingyu Zhao,<sup>a</sup> Peng Zhang,<sup>c</sup> Minghua Chen,<sup>\*a</sup> Zhikun Zheng,<sup>b</sup> Zhiji Han,<sup>b</sup> Tingshun Zhu,<sup>b</sup> Yexiang Tong,<sup>b</sup> and Xihong Lu<sup>\*a,b</sup>

<sup>a</sup>Key Laboratory of Engineering Dielectric and Applications (Ministry of Education), Harbin University of Science and Technology, Harbin 150080, China. E-mail: [mhchen@hrbust.edu.cn](mailto:mhchen@hrbust.edu.cn) (M. Chen)

<sup>b</sup>MOE of the Key Laboratory of Bioinorganic and Synthetic Chemistry, The Key Lab of Low-carbon Chem & Energy Conservation of Guangdong Province, School of Chemistry, Sun Yat-Sen University, Guangzhou 510275, P. R. China.  
E-mail: [luxh6@mail.sysu.edu.cn](mailto:luxh6@mail.sysu.edu.cn) (X. Lu)

<sup>c</sup>School of Environment and Civil Engineering, Guangdong Engineering and Technology Research Center for Advanced Nanomaterials, Dongguan University of Technology, Dongguan 523808, China.

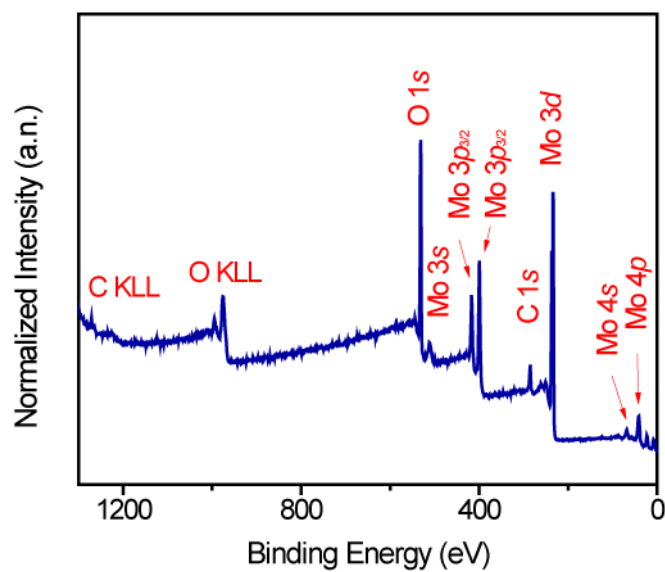

**Figure S1.** XPS survey spectrum of MoO<sub>3</sub> nanowire sample.

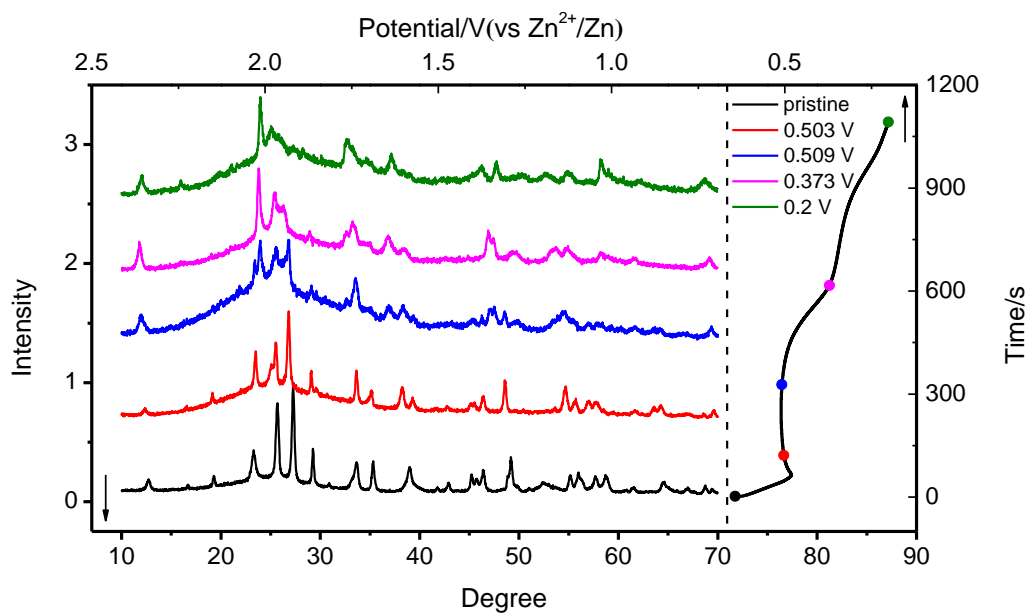

**Figure S2.** XRD pattern of sample at different voltages in the first discharge segment.

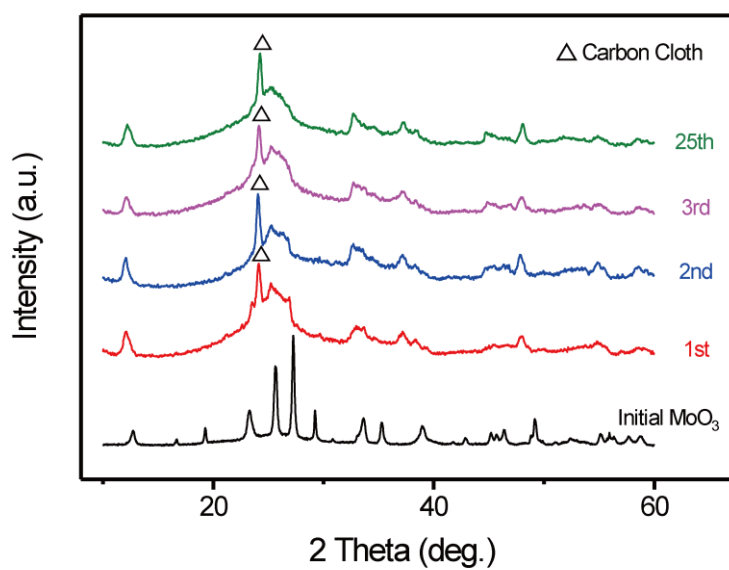

**Figure S3.** XRD pattern of MoO<sub>3</sub> at original state or after different charging and discharging cycles.

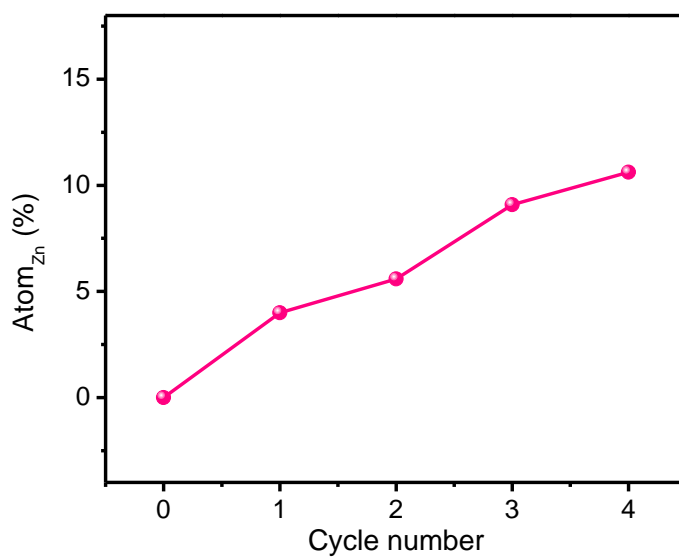

**Figure S4.** Zinc content in extraction-state MoO<sub>3</sub> after different charge-discharge cycles.

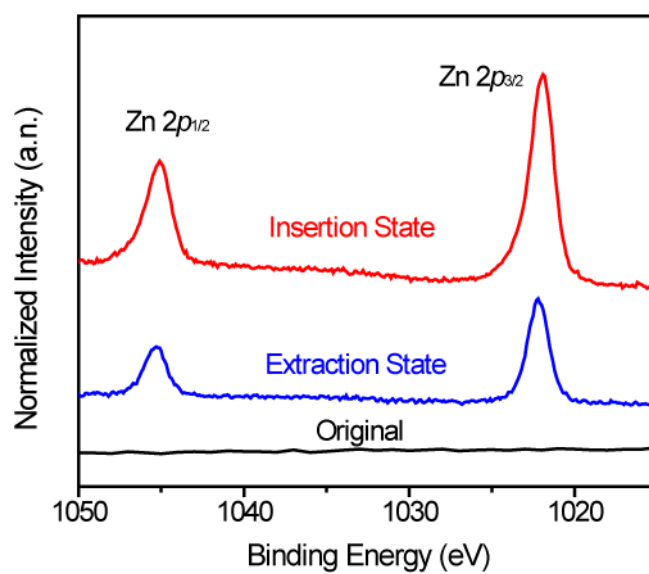

**Figure S5.** Zn 2p XPS spectra for MoO<sub>3</sub> at pristine, extraction and insertion state.

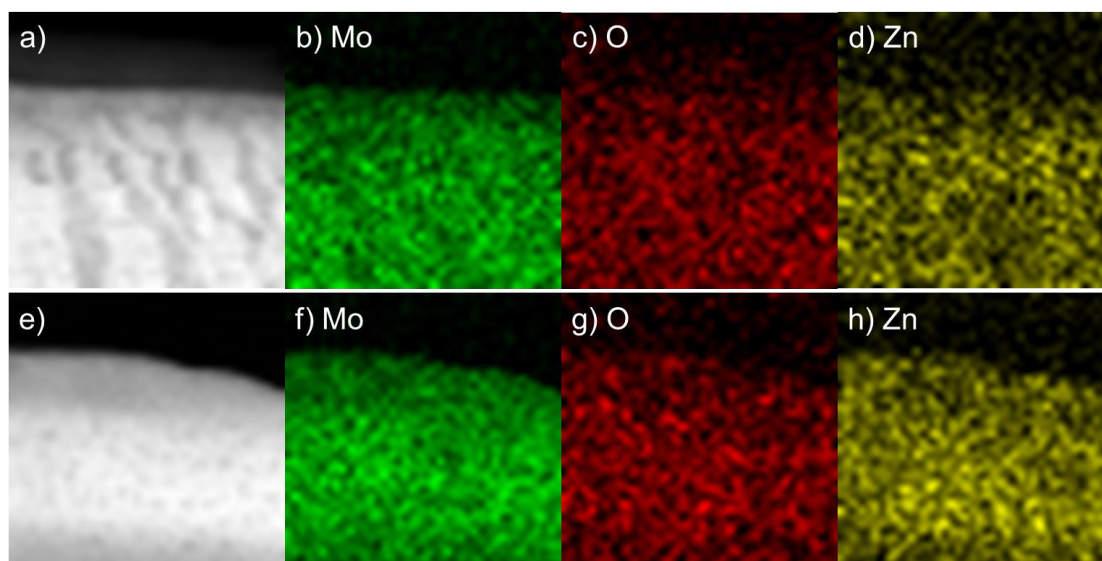

**Figure S6.** TEM-Mapping of (a-d) extraction state and (e-h) insertion state of MoO<sub>3</sub> electrode.

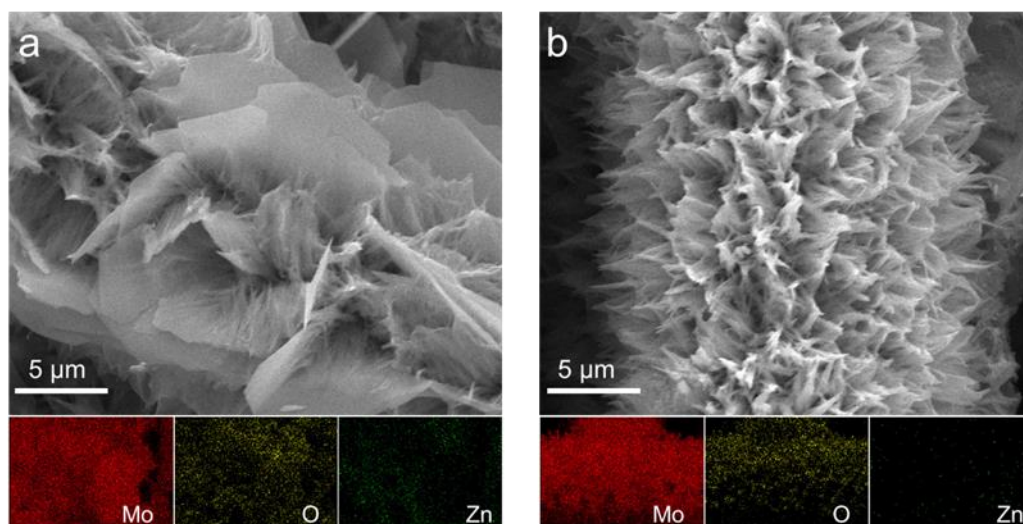

**Figure S7.** SEM images of MoO<sub>3</sub> at (a) 0.2 V (insertion state) and (b) 1.3 V (extraction state). Nether figures are corresponding SEM mapping data.

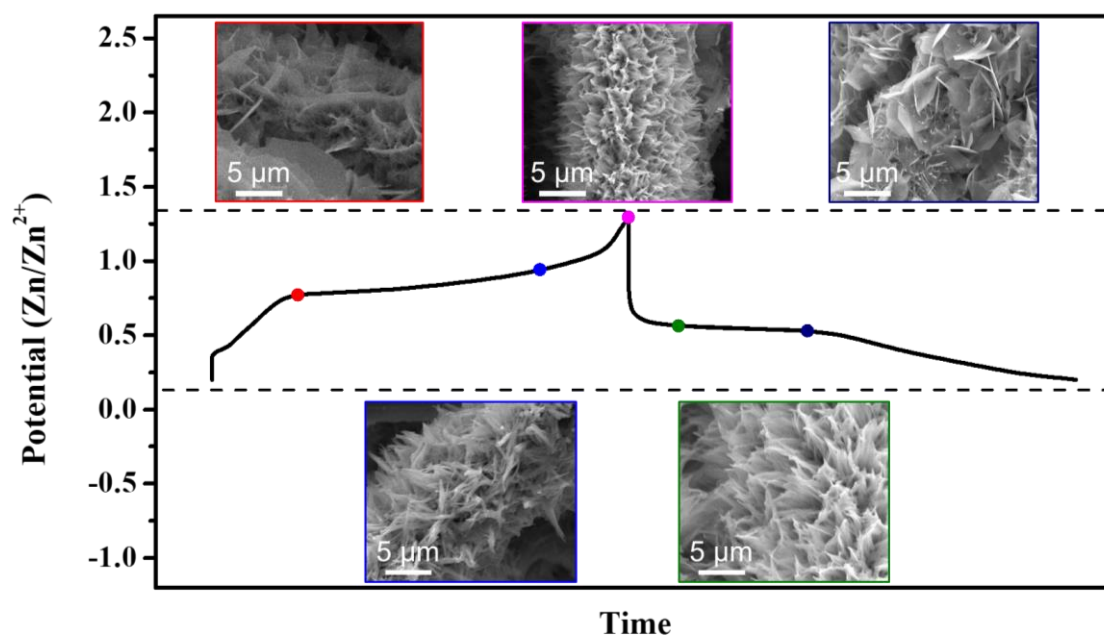

**Figure S8.** Ex-situ SEM images of cathode at different voltages in one charge/discharge cycle.

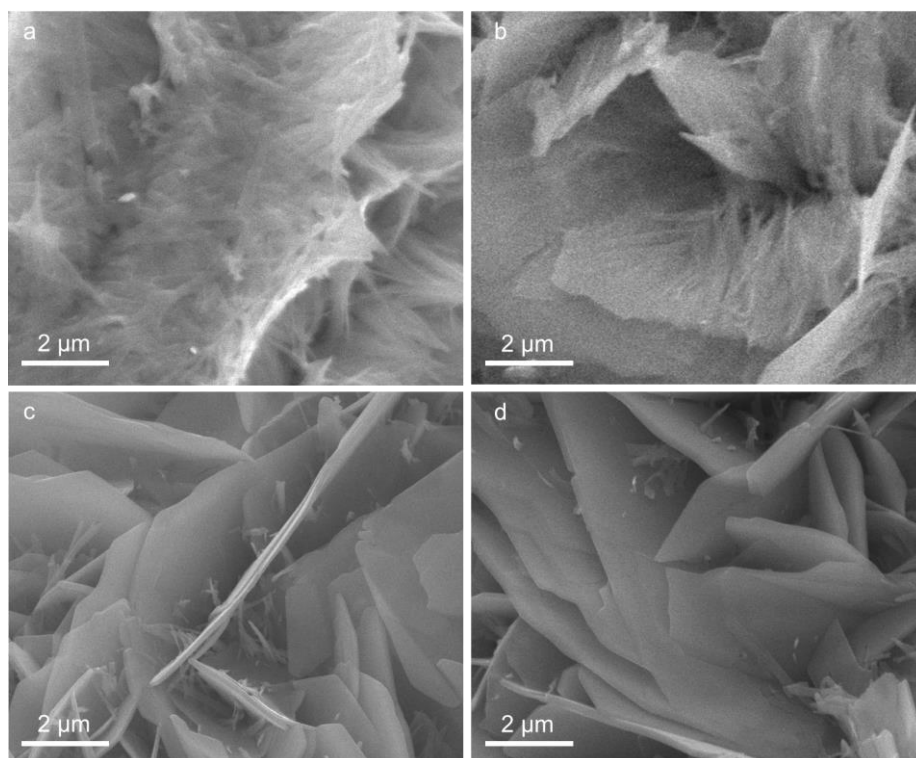

**Figure S9.** SEM of insertion state cathode discharge at (a)  $4 \text{ A g}^{-1}$ , (b)  $1.6 \text{ A g}^{-1}$ , (c)  $0.8 \text{ A g}^{-1}$  and (d)  $0.4 \text{ A g}^{-1}$ .

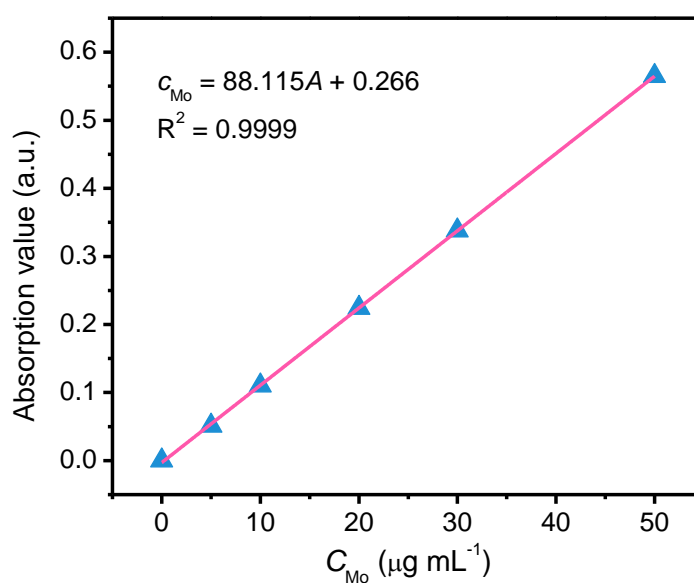

**Figure S10.** Standard curve of UV-Visible spectra for quantitative analysis of concentration of Mo species ( $C_{\text{Mo}}$ ).

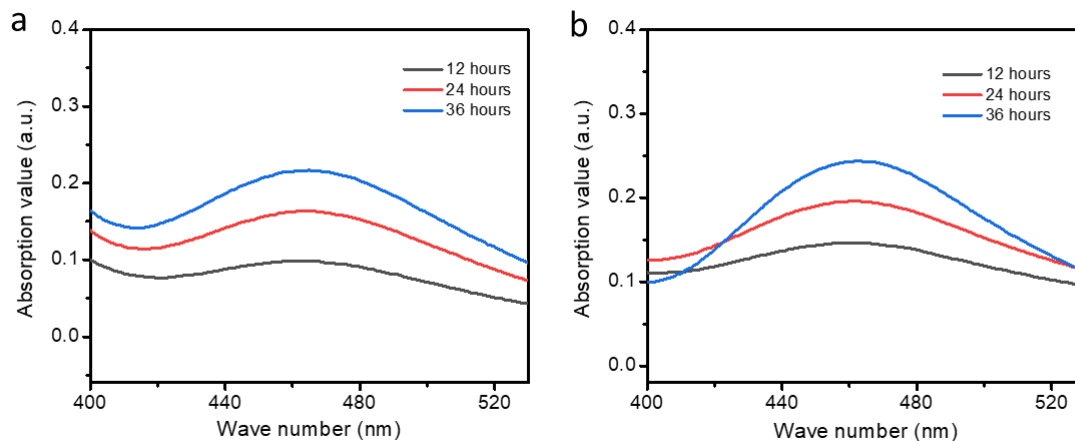

**Figure S11.** UV-Visible spectra of aqueous electrolyte after (a) pristine and (b) extraction-state MoO<sub>3</sub> were immersed for different time.

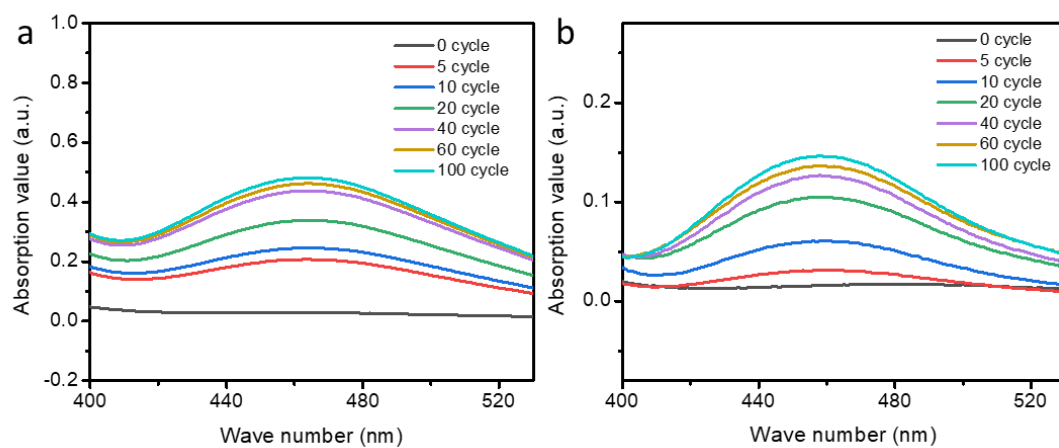

**Figure S12.** UV-Visible spectra of (a) aqueous electrolyte and (b) quasi-solid-state electrolyte after different charge-discharge cycles.



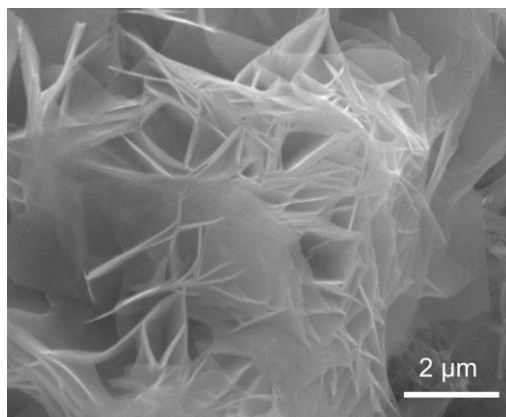

**Figure S13.** SEM image of insertion-state MoO<sub>3</sub> in quasi-solid-state electrolyte.

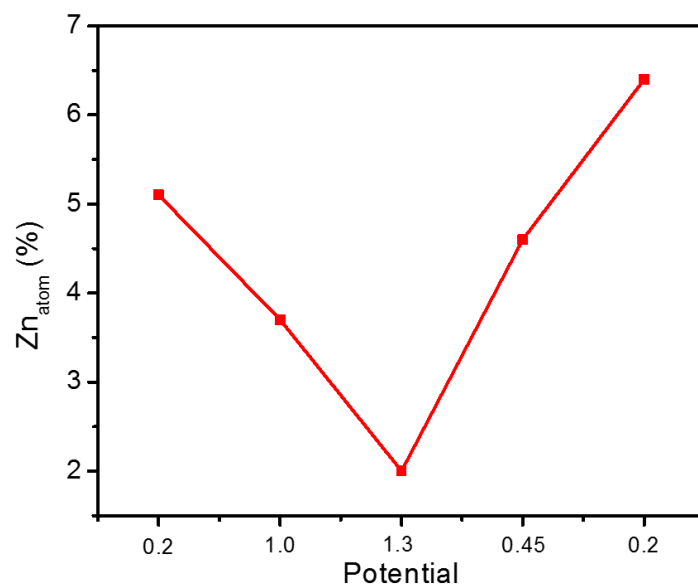

**Figure S14.** Zinc atom content of cathode in quasi-solid-state electrolyte at different voltages in first charge/discharge cycle.

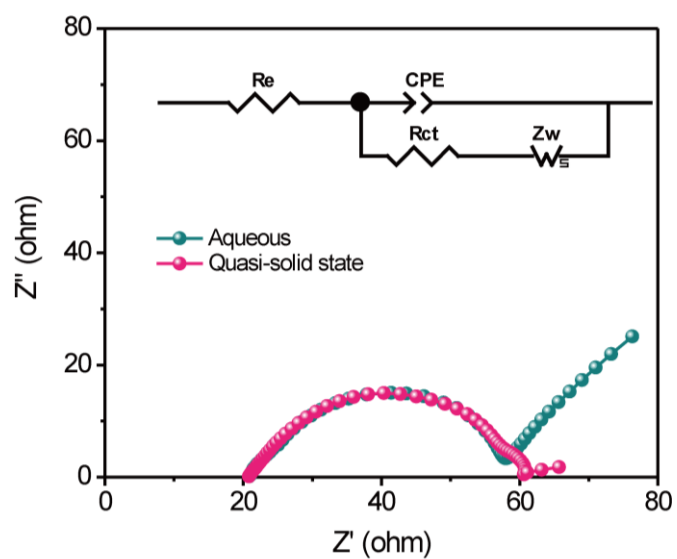

**Figure S15.** Nyquist plots of the aqueous and quasi-solid-state Zn//MoO<sub>3</sub> batteries. The inset shows the equivalent-circuit diagram.

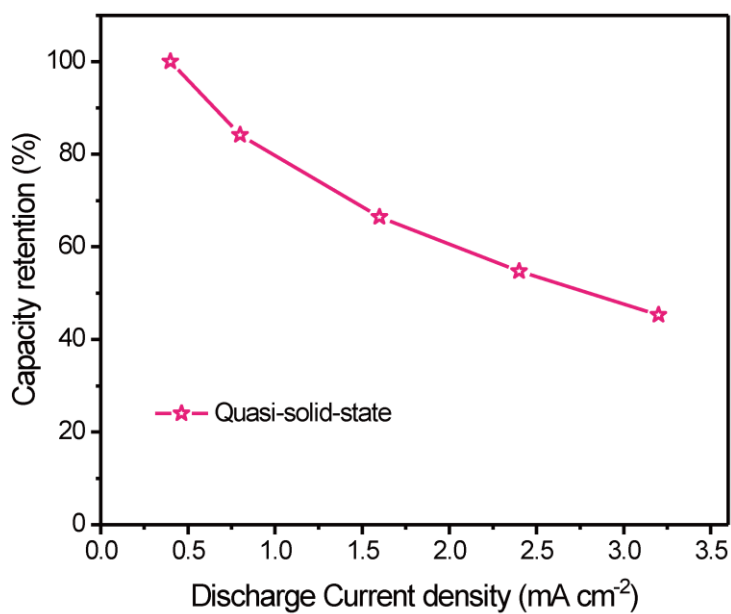

**Figure S16.** Rate performance of the quasi-solid-state device.

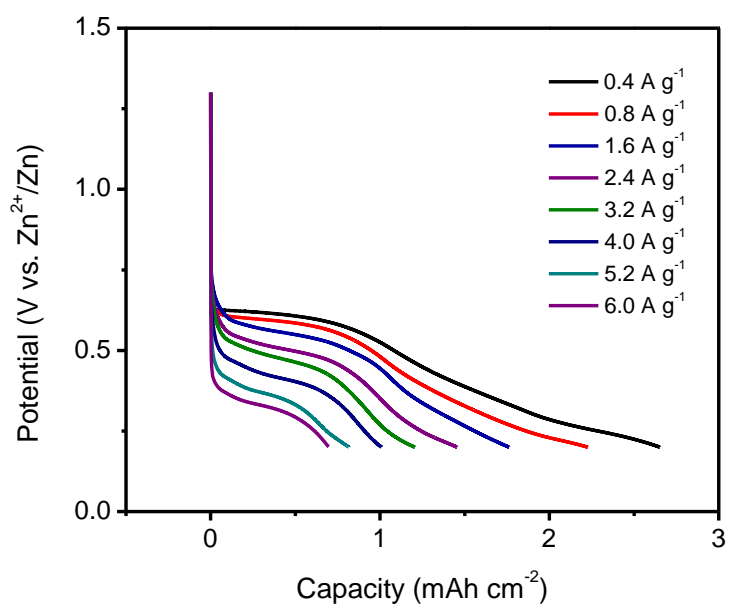

**Figure S17.** Capacity of the quasi-solid-state battery under different current densities (1C = 0.4 A g<sup>-1</sup>).
